# Supplementary material for: Surface plasmon resonance detection of UV irradiation-induced DNA damage and photoenzymatic repair processes through specific interaction between consensus double-stranded DNA and p53 protein
Source: Royal Society of Chemistry journal article supplement (doi:10.1039/d2an01847k), 2022-12-26
Supplement: d2an01847k1.pdf [file d2an01847k1.pdf]

## Supporting Information

### **Surface Plasmon Resonance Detection of UV Irradiation-Induced DNA Damage and Photoenzymatic Repair Processes through Specific Interaction between Consensus Double-Stranded DNA and p53 Protein**

Yuhan He <sup>a</sup>, Sijia Chen <sup>a</sup>, Guoyang Xie <sup>a</sup>, Xinyao Yi <sup>a\*</sup>, Jianxiu Wang <sup>a\*</sup>

<sup>a</sup> Hunan Provincial Key Laboratory of Micro & Nano Materials Interface Science, College of Chemistry and Chemical Engineering, Central South University, Changsha, Hunan, P. R. China  
410083

\* Corresponding author, Email address: yixinyao@csu.edu.cn (Xinyao Yi); jxiuwang@csu.edu.cn (Jianxiu Wang)

**Table S1. Sequences of DNAs**

| DNAs                           | Sequences (from 5' to 3')                                        |
|--------------------------------|------------------------------------------------------------------|
| probe for consensus dsDNA      | $\text{NH}_2\text{-(CH}_2\text{)}_6\text{-GAACATGCTTAGACATGCTT}$ |
| target for consensus dsDNA     | AAGCATGTCTAAGCATGTTC                                             |
| probe for non-consensus dsDNA  | $\text{NH}_2\text{-(CH}_2\text{)}_6\text{-GTCGGCCGAGGTCGGCCGAG}$ |
| target for non-consensus dsDNA | CTCGGCCGACCTCGGCCGAC                                             |

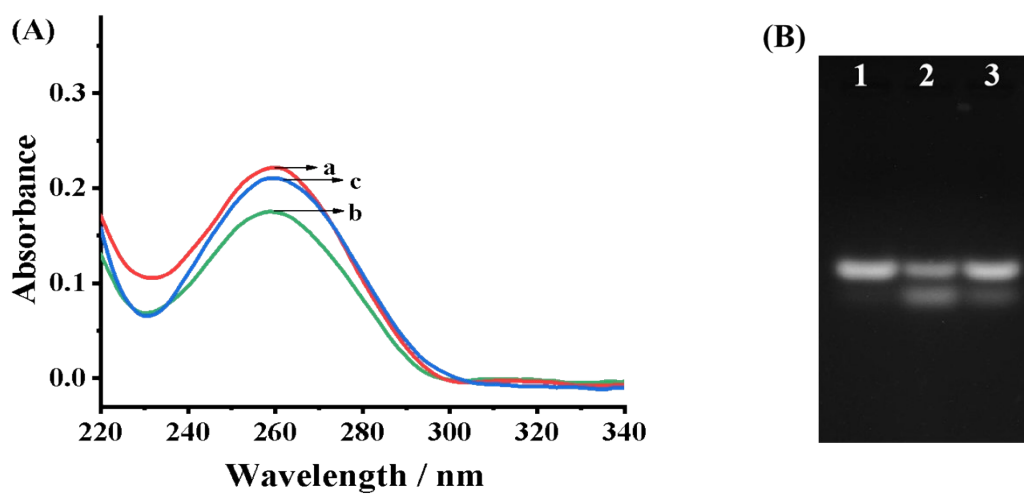

**Figure S1.** (A) UV-vis absorption spectra of (a) normal target DNA, (b) damaged target DNA, and (c) photoenzymatically repaired target DNA. (B) Gel electrophoresis assay of normal consensus dsDNA (lane 1), dsDNA between probe DNA and damaged target DNA (lane 2) and dsDNA between probe DNA and photoenzymatically repaired target DNA (lane 3).
